# Supplementary material
Source: publisher site journal article supplement (https://neobiota.pensoft.net/article/34941/download/suppl/34/)
Supplement: Supplementary file 1

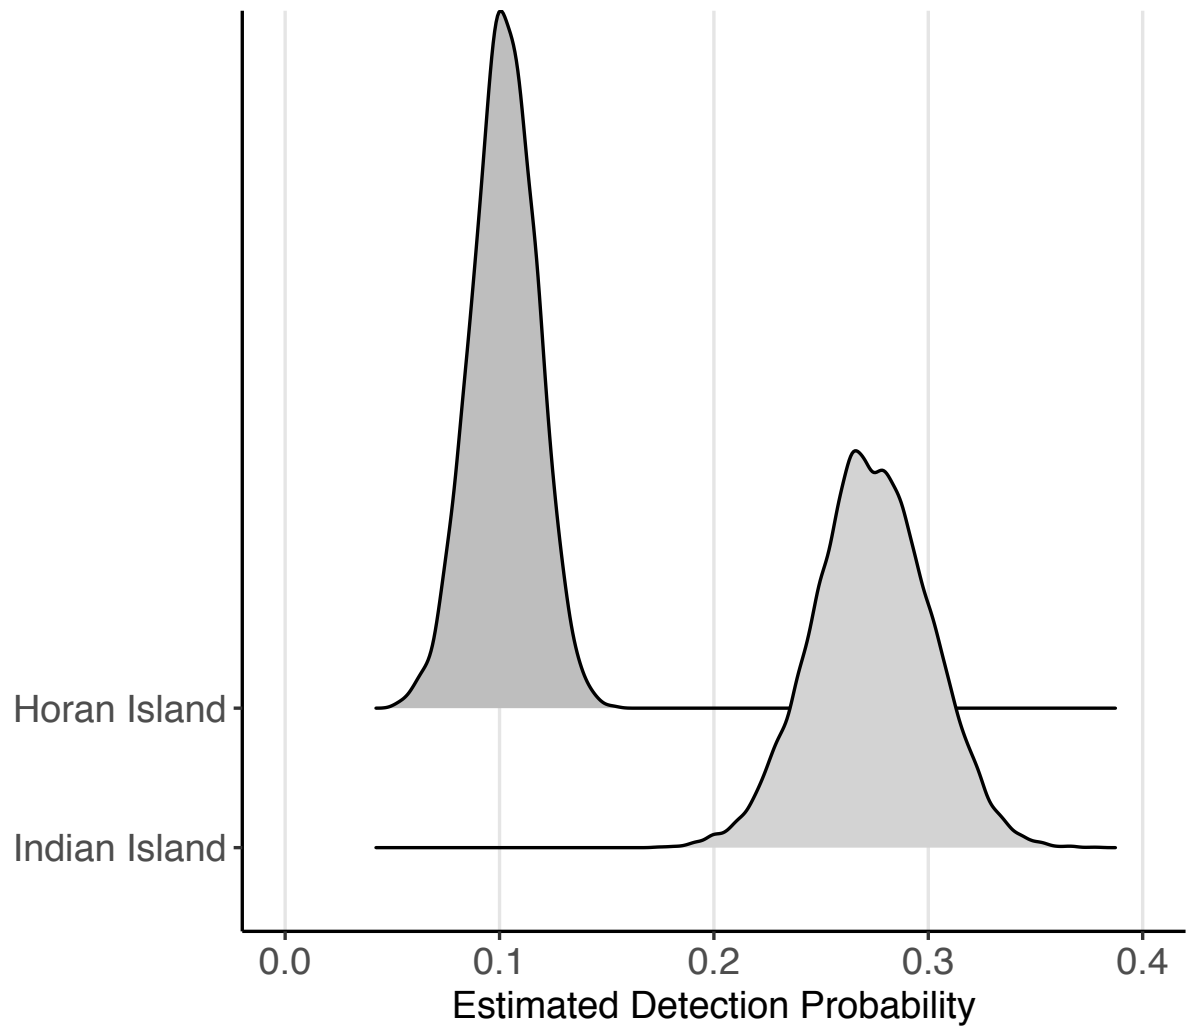

**S4.** Posterior distributions of the detection probabilities of cane toads on Horan and Indian Islands.
